# Supplementary material for: Photoactivated bioinspired lipoplexes with a chalcone/flavylium photoswitch enhance siRNA delivery—towards precise spatiotemporal control in gene delivery
Source: Royal Society of Chemistry journal article supplement (doi:10.1039/d5tb01908g), 2025-01-01
Supplement: d5tb01908g1.pdf [file d5tb01908g1.pdf]

## Supplementary Information

### **Photoactivated bioinspired lipoplexes with a chalcone/flavylium photoswitch enhance siRNA delivery—towards precise spatiotemporal control in gene silencing**

Dmitriy Moreira<sup>1</sup>, Isabel S. Oliveira<sup>1</sup>, Pedro Mateus<sup>4</sup>, André Seco<sup>4</sup>, Catarina Roma-Rodrigues<sup>2,3,4</sup>, Pedro V. Baptista<sup>2,3</sup>, Alexandra R. Fernandes<sup>2,3</sup>, Nuno Basílio<sup>5\*</sup>, Eduardo F. Marques<sup>1\*</sup>

<sup>1</sup>CIQUP, IMS (Institute of Molecular Sciences), Departamento de Química e Bioquímica, Faculdade de Ciências, Universidade do Porto, Rua do Campo Alegre, 4169-007 Porto, Portugal

<sup>2</sup>UCIBIO – Applied Molecular Biosciences Unit, Department of Life Sciences, NOVA School of Science and Technology, NOVA University Lisbon, Caparica, 2819-516, Portugal

<sup>3</sup>Associate Laboratory i4HB – Institute for Health and Bioeconomy, NOVA School of Science and Technology, NOVA University Lisbon, Caparica, 2819-516, Portugal

<sup>4</sup>BIORG—Bioengineering and Sustainability Research Group, Faculdade de Engenharia, Universidade Lusófona, Av. Campo Grande 376, 1749-024 Lisbon, Portugal

<sup>5</sup>LAQV-REQUIMTE, Departamento de Química, Faculdade de Ciências e Tecnologia, Universidade Nova de Lisboa, 2829-516 Caparica, Portugal

#### **Contents**

S1. Synthesis of C<sub>6</sub>NCh, p. 2.

S2. Synthesis of C<sub>4</sub>NCh, p. 6.

S3. Lipid mixing assay - additional data, p. 10.

S4. Design of C<sub>n</sub>NCh/MO vesicles: composition, structural features and cytotoxicity – additional data, p.13.

S5. Nucleic acid compaction – additional data, p.14.

S6. Lipoplex response to stimuli - – additional data, p. 15.

S7. Gene silencing – additional data, p. 18.

References, p. 18.

## S1. Synthesis of C<sub>6</sub>NCh

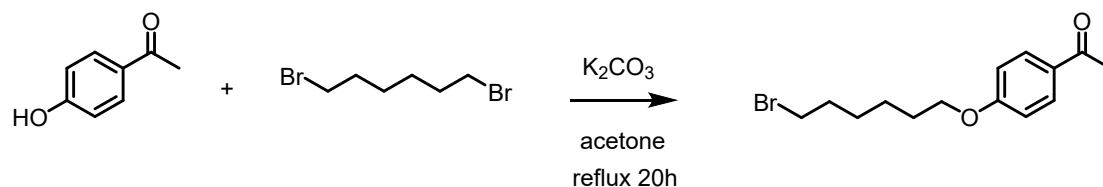

**Scheme 1.** Synthesis of acetophenone 1.

Acetophenone **1** was synthesized using a protocol adapted from the literature.<sup>1</sup> A mixture of 4-hydroxyacetophenone (2.8 g, 20.5 mmol), 1,6-dibromohexane (50.0 g, 205.1 mmol) and potassium carbonate (20.0 g, 145.0 mmol) in acetone (80 mL) was refluxed for 20 hours. The reaction was followed by TLC using chloroform as the eluent. After cooling, the precipitated salts were removed by filtration and the solvent was dried *in vacuo*. The excess 1,6-dibromohexane was separated on a silica gel column eluting with hexane. Then chloroform was used to elute the product. Gave an oil which later solidifies (5.858 g, h = 95%). <sup>1</sup>H NMR (400 MHz, CDCl<sub>3</sub>),  $\delta$  (ppm): 7.93 (d,  $J$  = 8.5 Hz, 2H), 6.92 (d,  $J$  = 8.5 Hz, 2H), 4.03 (t,  $J$  = 6.3 Hz, 2H), 3.43 (t,  $J$  = 6.3 Hz, 2H), 2.55 (s, 3H), 1.90 (m, 2H), 1.83 (m, 2H), 1.52 (m, 4H) ppm.

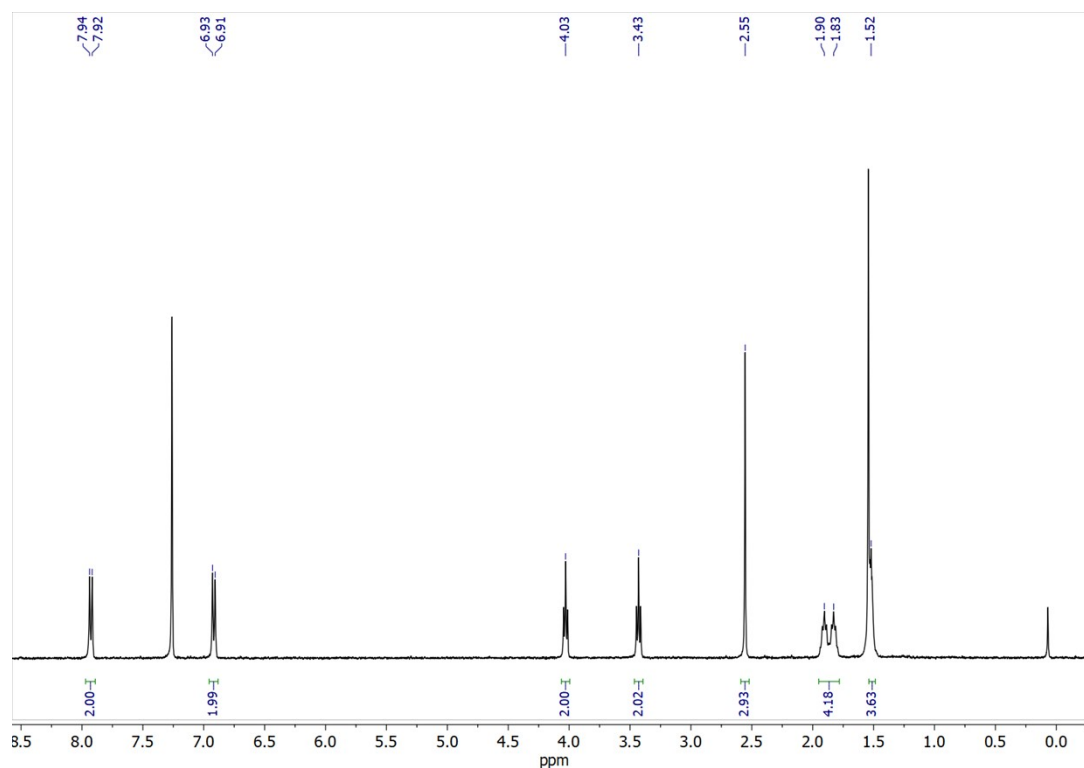

**Figure S1.** <sup>1</sup>H NMR (400 MHz) spectrum of acetophenone 1 in CDCl<sub>3</sub>.

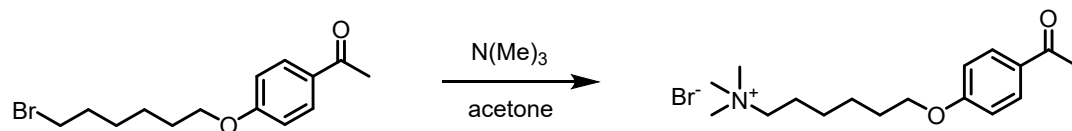

**Scheme 2.** Synthesis of acetophenone 2.

Acetophenone **1** (2 g, 6.68 mmol) was dissolved in acetone (48 mL) and  $\text{N}(\text{Me})_3$  45% in water (10.4 mL, 66.9 mmol) was added. The mixture was kept stirring at 40°C for 18h. The mixture was added dropwise to diethyl ether (400 mL). The precipitate was filtered and washed with ether. A white solid was obtained (2.24 g, h = 94%).  $^1\text{H}$  NMR (400 MHz,  $\text{CD}_3\text{OD}$ ),  $\delta$  (ppm): 8.23 (d,  $J = 8.5\text{ Hz}$ , 2H), 7.31 (d,  $J = 8.5\text{ Hz}$ , 2H), 4.40 (t,  $J = 6.3\text{ Hz}$ , 2H), 3.53 (t,  $J = 6.3\text{ Hz}$ , 2H), 3.31 (s, 9H), 2.84 (s, 3H), 2.05 (m, 4H), 1.76 (m, 2H), 1.66 (m, 2H) ppm.

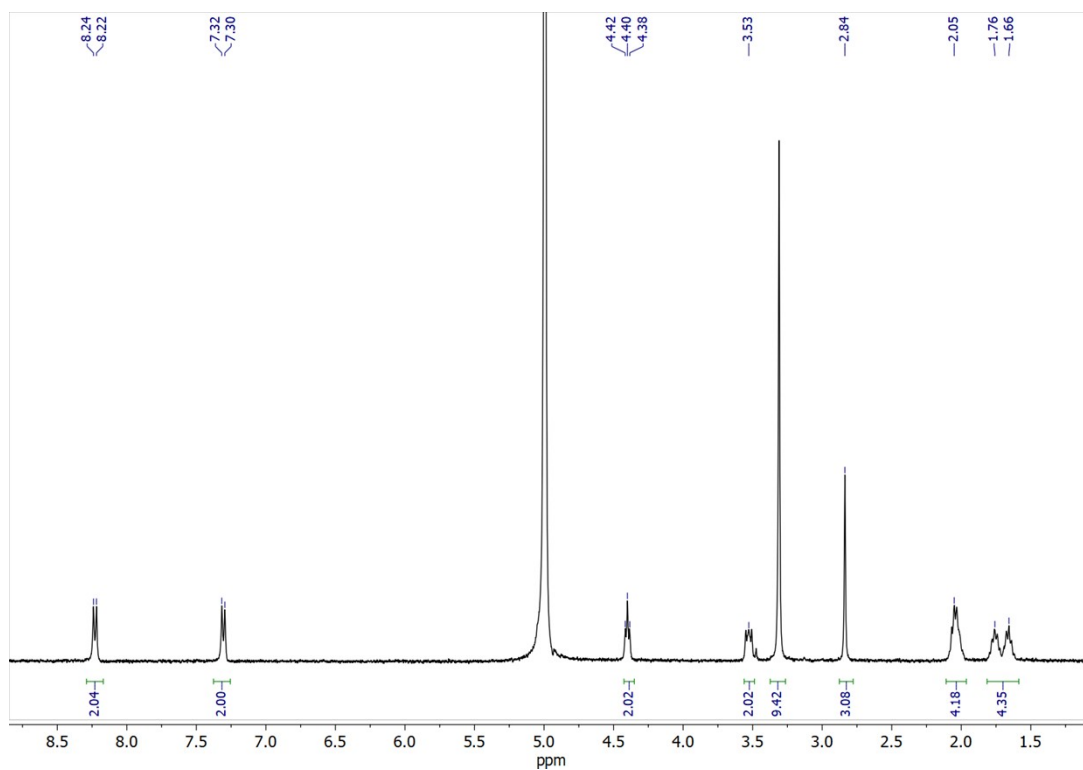

**Figure S2.**  $^1\text{H}$  NMR (400 MHz) spectrum of acetophenone 2 in  $\text{CD}_3\text{OD}$ .

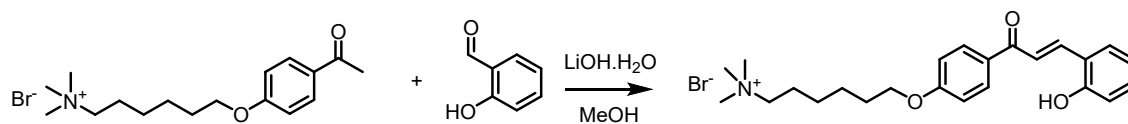

**Scheme 3:.** Synthesis of *trans*-chalcone C<sub>6</sub>NCh

LiOH.H<sub>2</sub>O (1873 mg, 44.64 mmol) was added to a solution of acetophenone **2** (1 g, 2.79 mmol) dissolved in 20 mL methanol. Salicylaldehyde (1.362 g, 11.16 mmol) was added slowly at RT after which the mixture was kept stirring at 55°C for 3 days. The mixture was allowed to cool to RT and neutralized with HBr 48% (4 mL). A precipitate formed which was filtered and washed with diethyl ether. The product was further purified by recrystallization from water (0.787 g, 61% yield). <sup>1</sup>H NMR (400MHz, CD<sub>3</sub>OD), δ (ppm): 8.09 (d, *J* = 15.8 Hz, 1H), 8.06 (dd, 2H), 7.82 (d, *J* = 15.8 Hz, 1H), 7.66 (d, *J* = 8.1 Hz, 1H), 7.25 (t, *J* = 6.6 Hz, 1H), 7.04 (dd, 2H), 7.66 (t, *J* = 6.6 Hz, 1H), 7.25 (d, *J* = 8.1 Hz, 1H), 4.12 (t, *J* = 6.4 Hz, 2H), 3.36 (t, *J* = 8.4 Hz, 2H), 3.13 (s, 9H), 1.85 (m, 4H), 1.62 (m, 2H), 1.48 ppm (m, 2H); <sup>13</sup>C NMR (101MHz, CD<sub>3</sub>OD), δ (ppm): 191.6, 164.6, 158.8, 141.8, 132.9, 132.3, 132.0, 130.4, 123.3, 122.4, 120.9, 117.1, 115.5, 69.1, 67.8, 53.5, 30.0, 27.0, 26.7, 23.9 ppm; HRMS (ESI) *m/z* calcd for C<sub>24</sub>H<sub>32</sub>NO<sub>3</sub> [M<sup>+</sup>]: 382.2377; found: 382.2395.

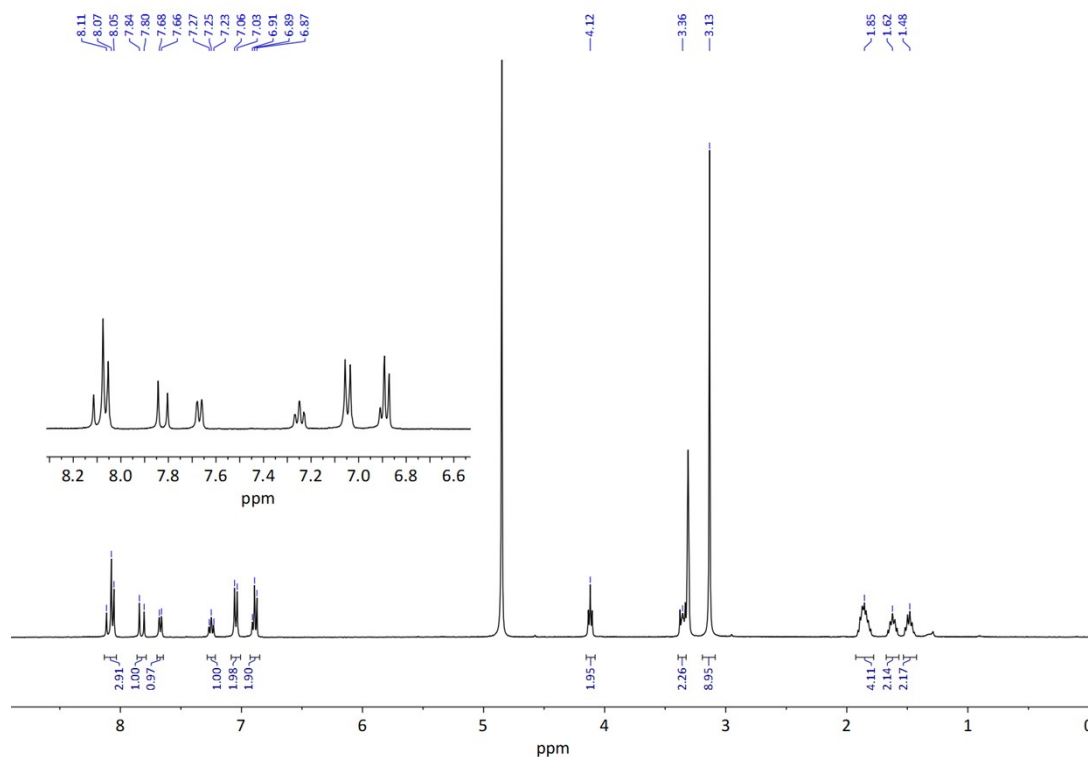

**Figure S3.** <sup>1</sup>H NMR (400 MHz) spectrum of *trans*-chalcone C<sub>6</sub>NCh in CD<sub>3</sub>OD.

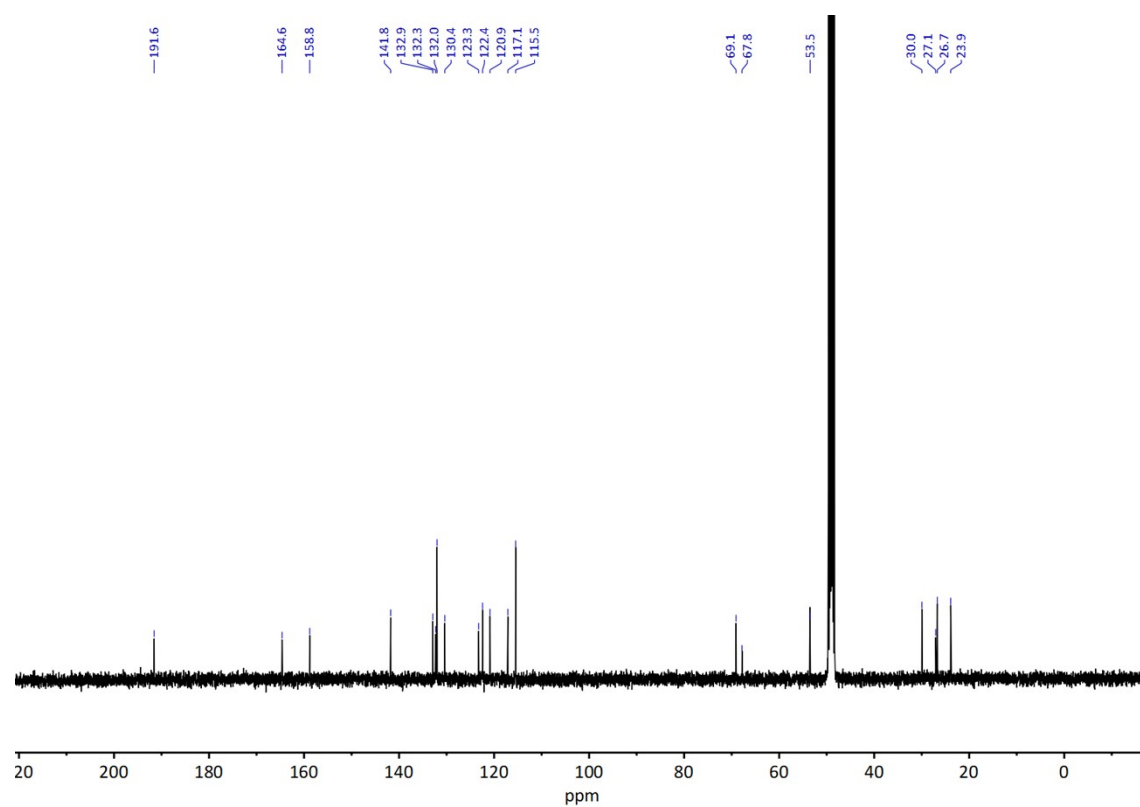

**Figure S4.** <sup>13</sup>C NMR (101 MHz) spectrum of *trans*-chalcone C<sub>6</sub>NCh in CD<sub>3</sub>OD.

## S2. Synthesis of C<sub>4</sub>NCh

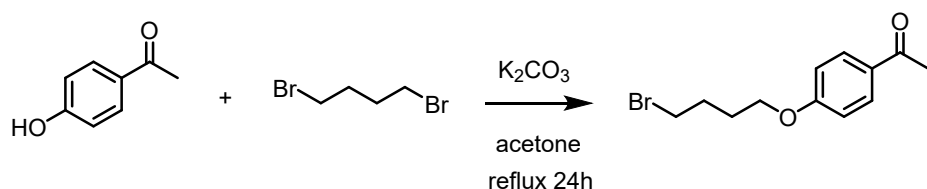

**Scheme 4.** Synthesis of acetophenone 3.

To a stirred solution of 4-hydroxyacetophenone (2.50 g, 18.36 mmol) in 120 mL of acetone, 44.80 g (183.62 mmol, 10 eq.) of 1,4-dibromobutane were added. After homogenization, 12.69 g (91.81 mmol, 5 eq.) of  $\text{K}_2\text{CO}_3$  were poured into the flask, mostly remaining in suspension. The reaction was left stirring under reflux for 24 hours after which the salts were filtered off and thoroughly washed with acetone. The solution was evaporated until dryness and the residue was redissolved in dichloromethane. This solution was washed 3 times with water to remove remaining salts. The water extracts were then washed with dichloromethane and the concentrated dichloromethane extracts were washed with brine and dried with magnesium sulphate prior to being dried by rotatory evaporation. The crude product (a transparent oil) was subjected to flash column chromatography, first with hexane to remove the starting dibromobutane, and then with chloroform to purify the desired product that, after complete dryness was obtained as a white solid (4.57 g,  $\eta = 83.3\%$ ). The product was then characterized by  $^1\text{H}$  NMR (400 MHz,  $\text{CDCl}_3$ ),  $\delta$  (ppm): 7.93 (d,  $J = 8.9$  Hz, 2H), 6.92 (d,  $J = 8.9$  Hz, 2H), 4.05 (t,  $J = 6.4$  Hz, 2H), 3.48 (t,  $J = 6.8$  Hz, 2H), 2.54 (s, 3H), 2.14 – 2.02 (m, 4H), 2.01 – 1.88 (m, 4H).

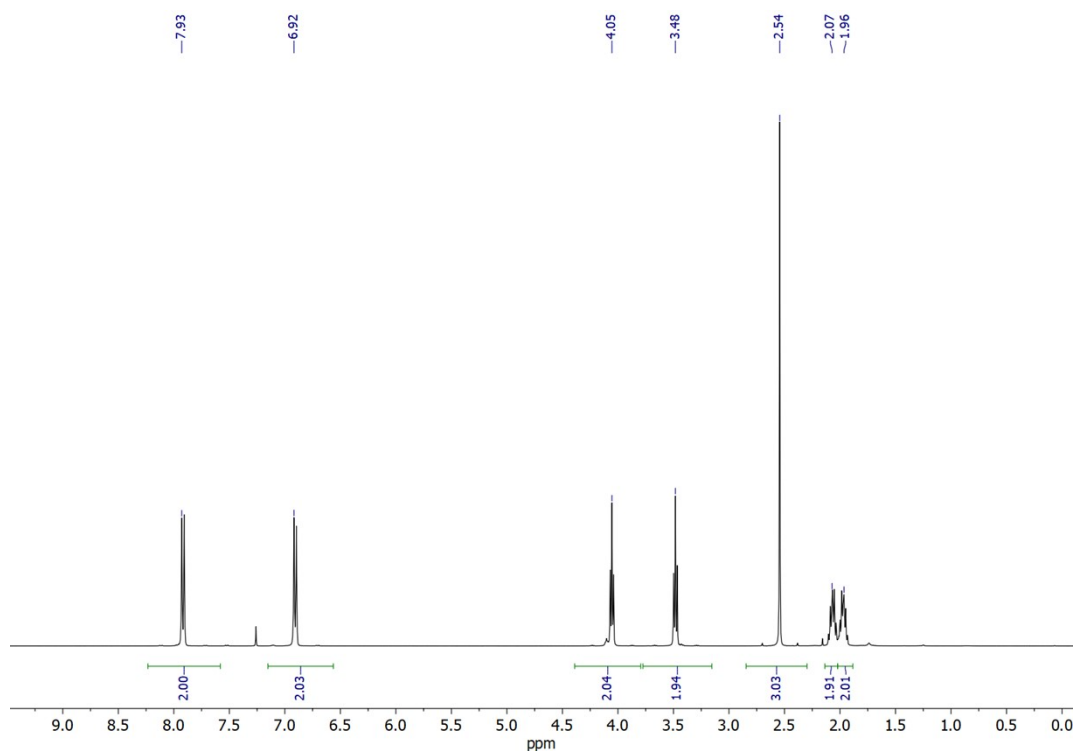

**Figure S5.**  $^1\text{H}$  NMR (400 MHz) spectrum of acetophenone 3 in  $\text{CDCl}_3$ .

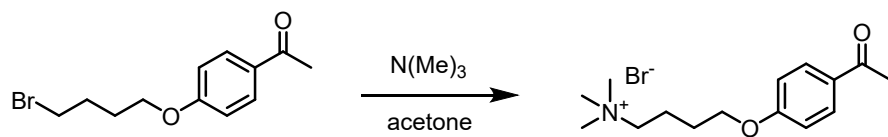

**Scheme 5.** Synthesis of acetophenone **4**.

1.00 g, 3.69 mmol, of acetophenone **3** was dissolved in 20 mL of acetone on a round bottom flask to which 2.56 mL (10 eq.) of trimethylamine, (45 % in water) were added. The solution was left stirring at 40 °C overnight. The following day all starting material had been consumed and the product was isolated by precipitation in an abundant quantity of diethyl ether which was also used to wash thoroughly the product from leftover trimethylamine. 1.13 g,  $\eta = 92.4\%$ , of a white solid was achieved and was further characterized by  $^1\text{H}$  NMR (400 MHz,  $\text{D}_2\text{O}$ ),  $\delta$  (ppm): 8.02 (d,  $J = 8.5$  Hz, 2H), 7.10 (d,  $J = 8.5$  Hz, 2H), 4.23 (t,  $J = 6.0$  Hz, 2H), 3.43 (t,  $J = 7.9$  Hz, 2H), 3.15 (s, 9H), 2.63 (s, 3H), 2.09 – 1.96 (m, 2H), 1.95 – 1.82 (m, 2H) and by  $^{13}\text{C}$  NMR (101 MHz,  $\text{D}_2\text{O}$ ),  $\delta$  (ppm): 202.60, 162.97, 131.24, 129.68, 114.51, 67.50, 66.17, 52.83, 25.88, 25.14, 19.39.

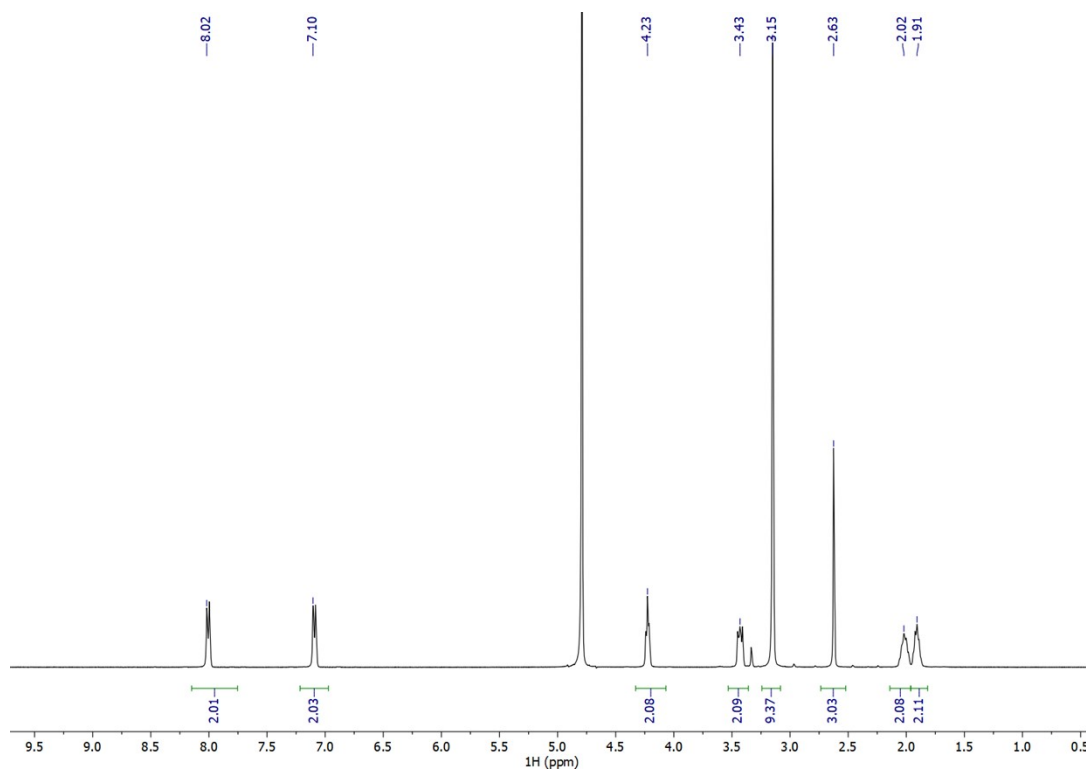

**Figure S6.**  $^1\text{H}$  NMR (400 MHz) spectrum of acetophenone **4** in  $\text{D}_2\text{O}$ .

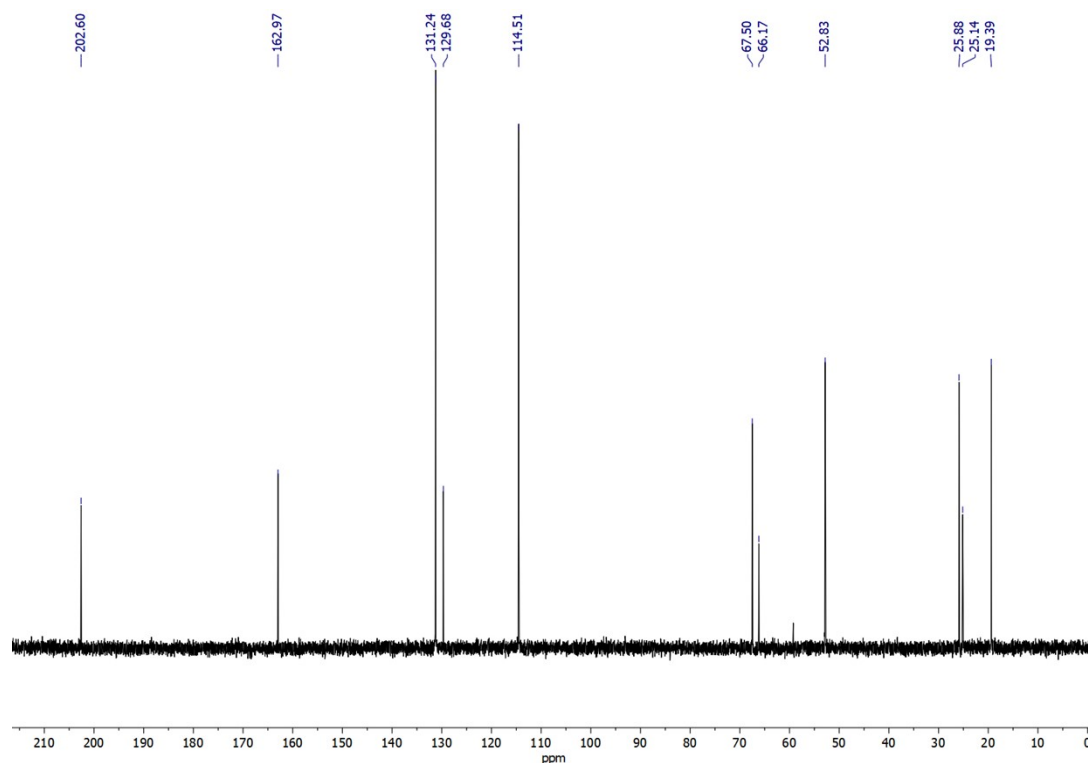

**Figure S7.**  $^{13}\text{C}$  NMR (101 MHz) spectrum of acetophenone 4 in  $\text{D}_2\text{O}$ .

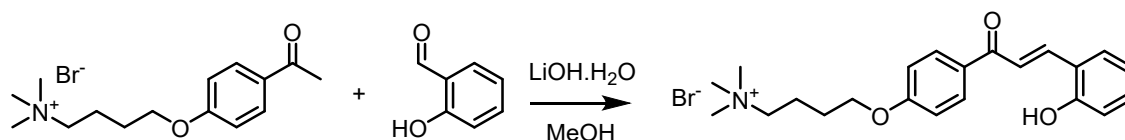

**Scheme 6.** Synthesis of *trans*-chalcone  $\text{C}_4\text{NCh}$ .

$\text{LiOH}\cdot\text{H}_2\text{O}$  (2.05 g, 48.86 mmol) was added to a solution of acetophenone **4** (1.02 g, 3.09 mmol) dissolved in 5 mL methanol. Salicylaldehyde (1.5 g, 12.28 mmol) was added slowly at RT after which the mixture was kept stirring at  $55^\circ\text{C}$  for 24 hours. The mixture was allowed to cool to RT and neutralized with  $\text{HBr}$  48%. The solvent was removed by rotary evaporation and the solid residue was washed with acetone and diethyl ether. The product was further purified by recrystallization from water (0.85 g, 63% yield).  $^1\text{H}$  NMR (400 MHz,  $\text{CD}_3\text{OD}$ ),  $\delta$  (ppm): 8.19 – 7.97 (m, 3H), 7.83 (d,  $J = 15.8$  Hz, 1H), 7.69 (dd,  $J = 8.1, 1.7$  Hz, 1H), 7.26 (td,  $J = 7.8, 1.7$  Hz, 1H), 7.16 – 7.03 (m, 2H), 6.98 – 6.83 (m, 2H), 4.19 (t,  $J = 5.9$  Hz, 2H), 3.47 (t,  $J = 8.6$  Hz, 2H), 3.18 (s, 9H), 2.18 – 1.98 (m, 2H), 1.98 – 1.84 (m, 2H) and by  $^{13}\text{C}$  NMR (101 MHz,  $\text{CD}_3\text{OD}$ ),  $\delta$  (ppm): 188.64, 161.38, 155.89, 138.91, 130.02, 129.62, 129.11, 127.47, 120.32, 119.50, 117.97, 114.19, 112.61, 65.46, 64.59, 50.66, 46.72, 46.51, 46.30, 46.09, 45.87, 45.66, 45.45, 24.12, 18.14.; HRMS (ESI)  $m/z$  calcd for  $\text{C}_{22}\text{H}_{28}\text{NO}_3$  [ $\text{M}^+$ ]: 354.2064; found: 354.2062.



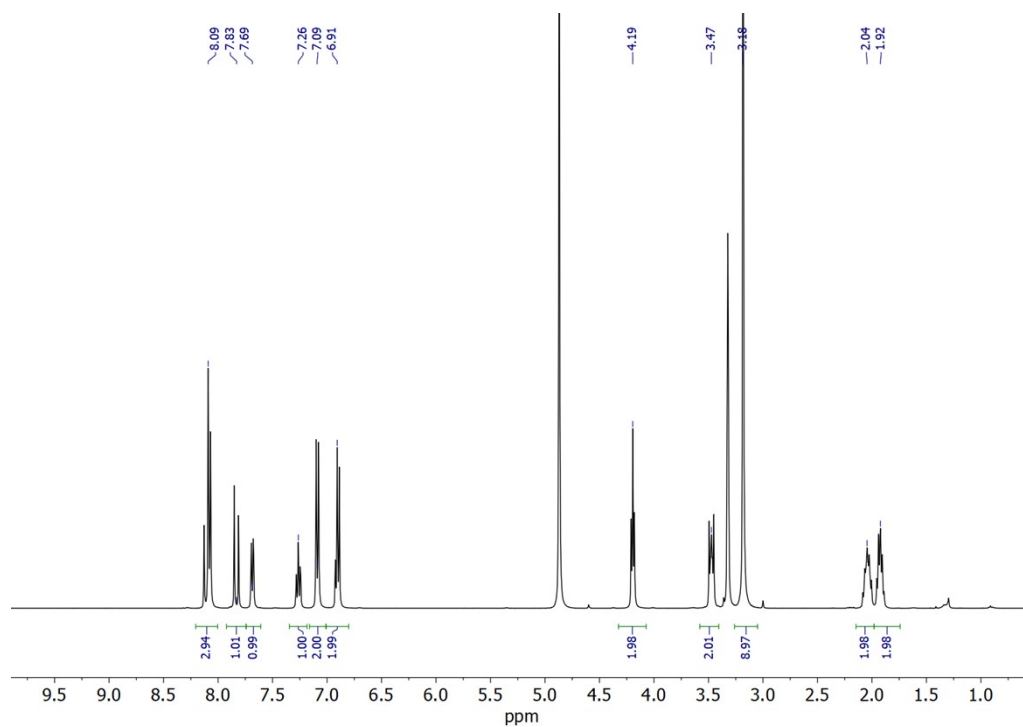

**Figure S8.** <sup>1</sup>H NMR (400 MHz) of *trans*-chalcone C<sub>4</sub>NCh in CD<sub>3</sub>OD.

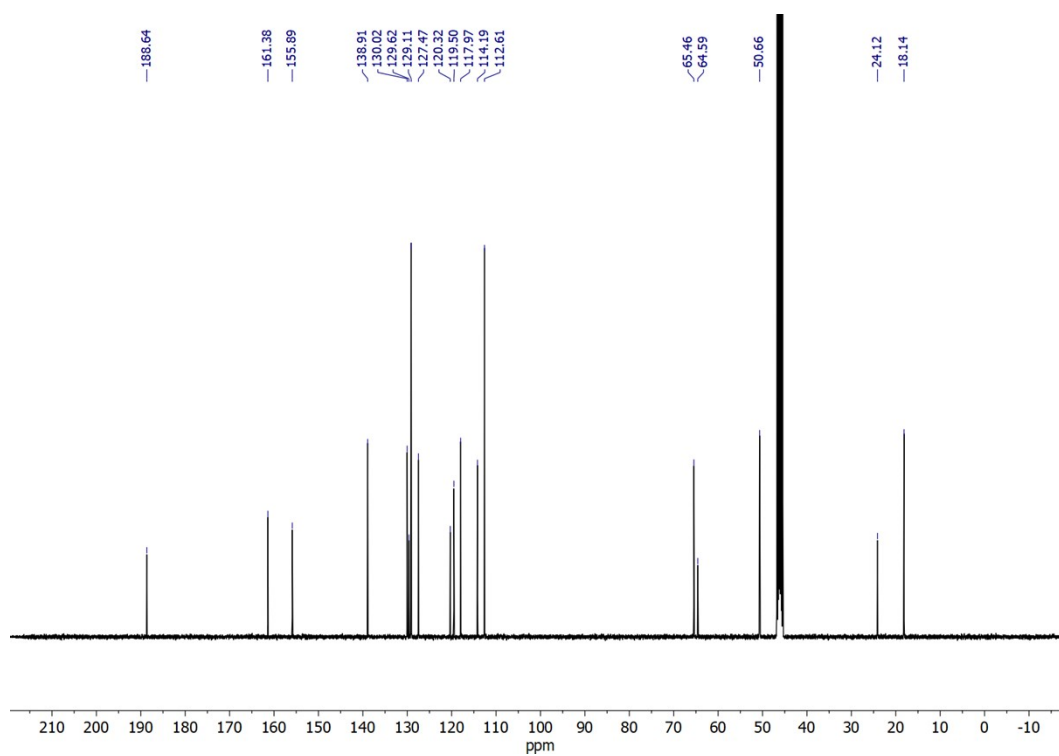

**Figure S9.** <sup>13</sup>C NMR (101 MHz) of *trans*-chalcone C<sub>4</sub>NCh in CD<sub>3</sub>OD.

### S3. Lipid mixing assay

To prepare biomimicking GUVs, two models were used — cytoplasmic membrane and endosome/lysosome membrane. All lipid components were dissolved in ethanol (except for 1,2-dioleoyl-sn-glycero-3-phosphoethanolamine-N-(7-nitro-2-1,3-benzoxadiazol-4-yl) (ammonium salt (NDB-PE), which was dissolved in methanol). The lipid solutions were then mixed in the desired proportions, and GUVs were formed through the lipid film hydration method. For the cytoplasmic membrane model, PBS (pH = 7.4) was used for hydration, while an acetate buffer (pH = 4.5, containing 0.9% (m/v) NaCl) was used for the endosomal/lysosomal model. After adding buffer so that total lipid concentration was 1.0 mM, the samples were incubated at 50°C without agitation for 6 hours. The final GUV dispersions had the following lipid compositions of 0.45/0.25/0.15/0.15/0.015/0.015 mM and 0.45/0.25/0.20/0.10/0.015/0.015 mM of POPC/DOPE/POPS/Chol/NBD-PE/Rho-PE for the cytoplasmic and endosome/lysosome membrane models, respectively (Fig. S10a and S10b).

A few key observations are to be made here with regards to the method followed for bio-mimicking GUV preparation.

The choice for composition of both bio-mimicking systems, and more particularly, what differentiated them was based on the fact that endosomal/lysosomal compartments have lower pH than extracellular ones, that endosomal/lysosomal membranes, have lower cholesterol (Chol) content and that they more negative surface charge (hence the higher POPS concentration).<sup>2-5</sup>.

The usage of unilamellar vesicles (specifically, GUVs) as biomimicking membranes and their method of preparation was due to unilamellar vesicles representing biological entities more accurately compared to a multilamellar or multivesicular vesicles. The particular conditions used in the film hydration method to favor GUV formation were: low lipid concentration (thin film), high salinity of hydration media and, long hydration time at high temperatures with minimal agitation.<sup>6, 7</sup>

Regarding the lipid mixing assay itself, concentration of fluorophores and the GUV-Lipoplex concentration and mixing ratio were chosen based on literature reports to maximize FRET prior to fusion occurring and to minimize FRET if total fusion was to occur. Similarly, the amount of TX-100 added is ought to simulate total fusion of the membranes present (Fig. S11a).<sup>8</sup>

Finally, emission spectra were collected at 24h post incubation of lipoplexes with GUVs because the AH<sup>+</sup> formed under irradiation in acidic media has an absorption band at  $\lambda = 440$  nm (Fig S10b and S14), which overlaps the excitation band of the donor fluorophore, thus partially blocking emission that occurs. However, since AH<sup>+</sup> is a product of a pseudo-equilibrium, it can be back-react into the other species of the chalcone/flavylium chemical network if kept under dark hot conditions.<sup>9</sup> We determined that keeping our lipoplexes that had been irradiated in acidic media in the dark at 37°C for 24h was enough to revert all AH<sup>+</sup> and hence, not affect the FRET measurements (Fig S10b).

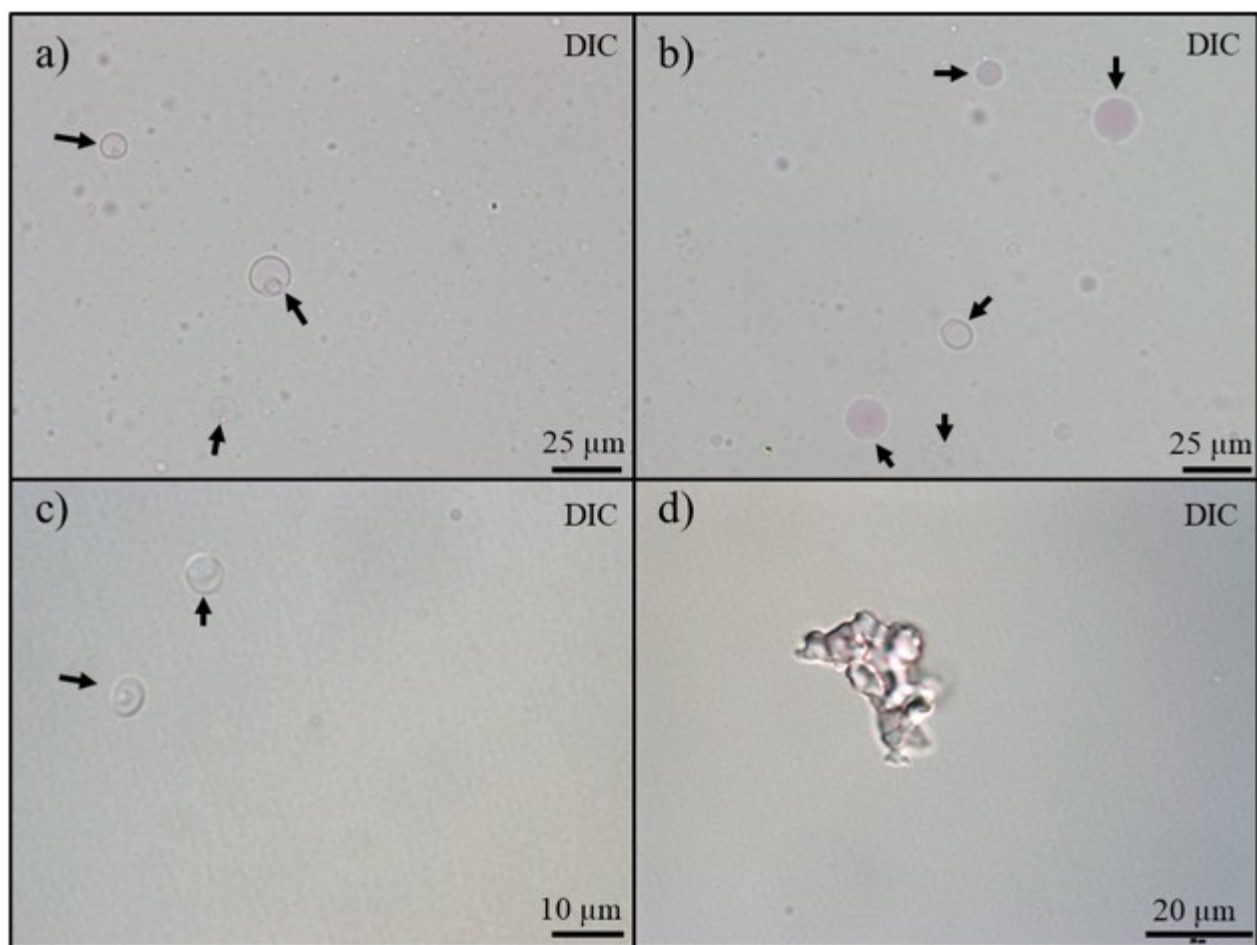

**Figure S10.** DIC micrographs of a) cell membrane mimicking GUVs containing POPC/DOPE/POPS/Chol = 45/25/15/15 mol % at a total  $c = 1.0$  mM in PBS, pH = 7.4; B) endosome/lysosome mimicking GUVs containing POPC/DOPE/POPS/Chol = 45/25/20/10 mol % at a total  $c = 1.0$  mM in acetate buffer (50 mM), pH = 4.5 containing 0.9% (m/v) NaCl; c) Resulting mixture from lipid mixing assay between  $R_6 = 2/1$ , N/P = 6 lipoplexes and the endosome mimicking GUVs at a [lipoplex]/[GUVs] = 12 ratio, 21 h after mixing at  $T = 37.0$  °C; d) Resulting mixture from lipid mixing assay between  $R_4 = 2/1$ , N/P = 6 lipoplexes and the cell membrane mimicking GUVs at a [lipoplex]/[GUVs] = 12 ratio, 21 h after mixing at  $T = 37.0$  °C.

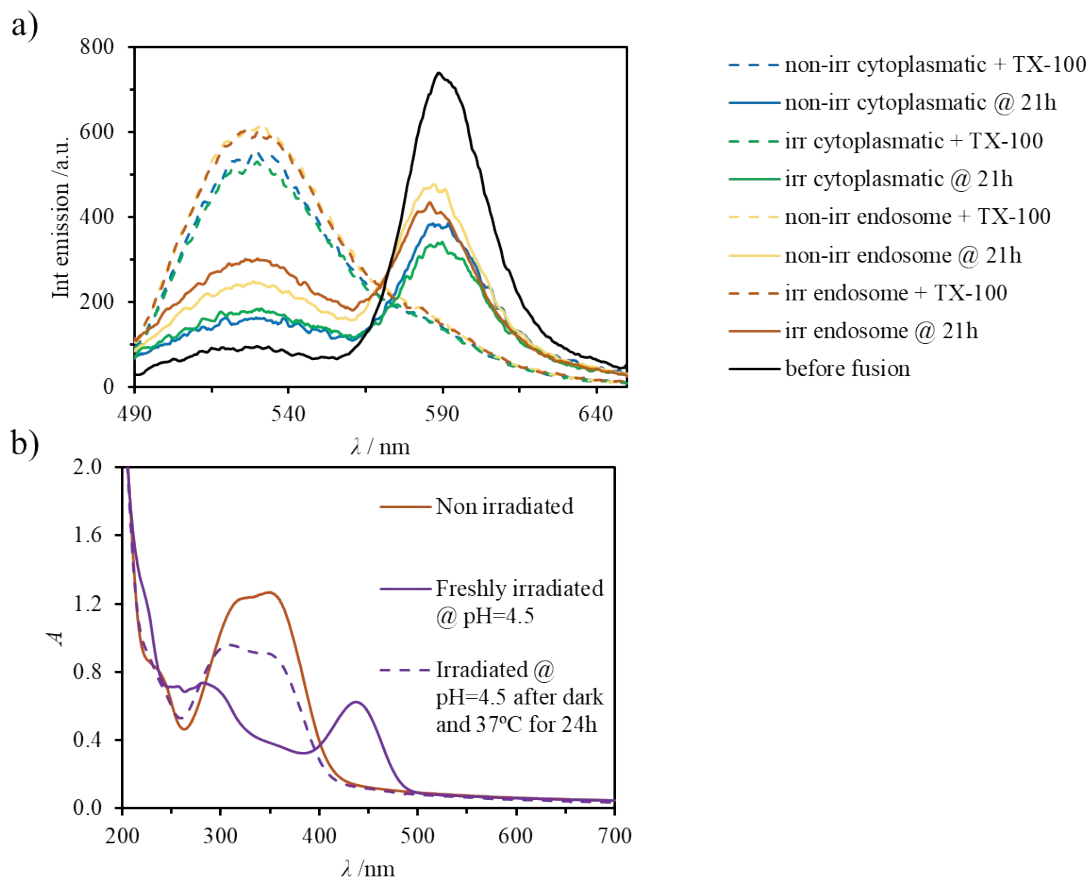

**Figure S11.** a) Emission spectra of the FRET fluorophore pair (NBD-PE and Rho-PE) under different conditions tested for fusion efficiency calculations. Spectra regarding samples where fluorophore-containing GUVs are mixed with lipoplexes (all except black line) are relative to an assay with  $R_4 = 2/1$  N/P =6 lipoplexes; b) UV-Vis spectra of  $R_6 = 1/1$  N/P =6 lipoplexes at pH = 4.5 before irradiation, right after irradiation until photostationary state has been reached and 24h after irradiation had finished while being kept under dark condition at  $T = 37.0$  °C.

## S4. Design of C<sub>n</sub>NCh/MO vesicles: composition, structural features and cytotoxicity – additional data

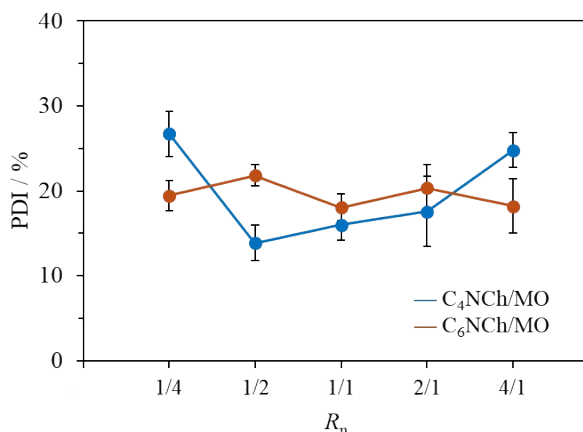

**Figure S12.** PDI values of the C<sub>n</sub>NCh/MO vesicles (3.0 mM) within 24 h after their preparation with different R<sub>n</sub> ratios at T = 25.0 °C.

**Table S1.** Relative IC<sub>50</sub> obtained for the neat chalcones and the different R<sub>n</sub> mixtures in human tumor cell lines (HCT116, A2780 and MCF7) and in normal primary human fibroblasts. IC<sub>50</sub> values are expressed as the mean ± SEM of at least two biological independent assays.

| Compound / mixture   | IC <sub>50</sub> / μM   |                         |           | Normal cells<br>Fibroblasts |
|----------------------|-------------------------|-------------------------|-----------|-----------------------------|
|                      | Tumor cells<br>HCT116   | A2780                   | MCF7      |                             |
| C <sub>4</sub> NCh   | > 50.0                  | > 50.0                  | > 50.0    | > 50.0                      |
| C <sub>6</sub> NCh   | > 50.0                  | > 50.0                  | > 50.0    | > 50.0                      |
| R <sub>4</sub> = 1/4 | > 50.0                  | -                       | -         | > 50.0                      |
| R <sub>4</sub> = 1/2 | > 50.0                  | -                       | -         | > 50.0                      |
| R <sub>4</sub> = 1/1 | > 50.0                  | -                       | -         | > 50.0                      |
| R <sub>4</sub> = 2/1 | > 50.0                  | -                       | -         | > 50.0                      |
| R <sub>4</sub> = 4/1 | > 50.0                  | -                       | -         | > 50.0                      |
| R <sub>6</sub> = 1/4 | > 50.0                  | -                       | -         | > 50.0                      |
| R <sub>6</sub> = 1/2 | > 50.0                  | -                       | -         | > 50.0                      |
| R <sub>6</sub> = 1/1 | > 50.0                  | -                       | -         | > 50.0                      |
| R <sub>6</sub> = 2/1 | > 50.0                  | -                       | -         | > 50.0                      |
| R <sub>6</sub> = 4/1 | 29.5 ± 0.5              | -                       | -         | > 50.0                      |
| Doxorubicin          | 0.5 ± 0.1 <sup>10</sup> | 0.1 ± 0.1 <sup>10</sup> | 1.2 ± 0.1 | 12.1 ± 0.2 <sup>10</sup>    |

## S5. Nucleic acid compaction – additional data

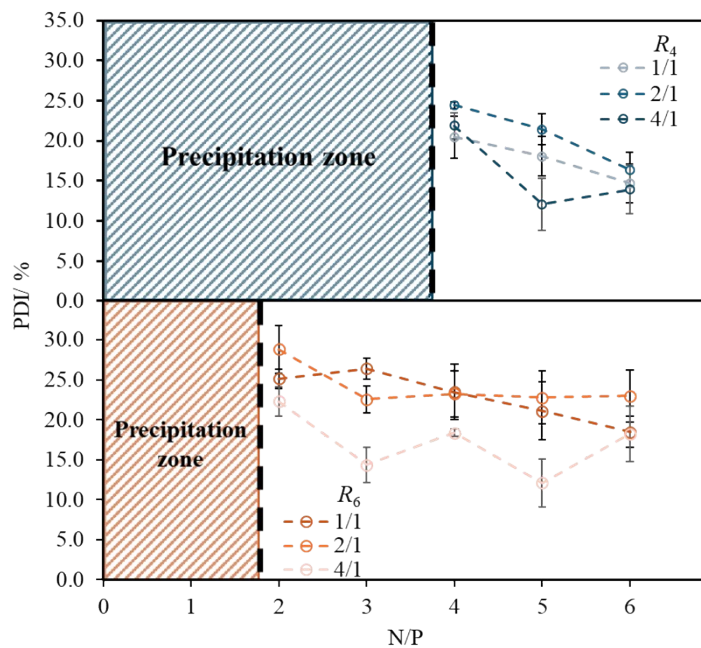

**Figure S13.** PDI values of the CnNCh/MO/DNA systems at different N/P ratios upon preparation (experiments were performed at a fixed DNA concentration  $[NA_b] = 2.5 \times 10^{-4}$  M and  $T = 25.0$  °C).

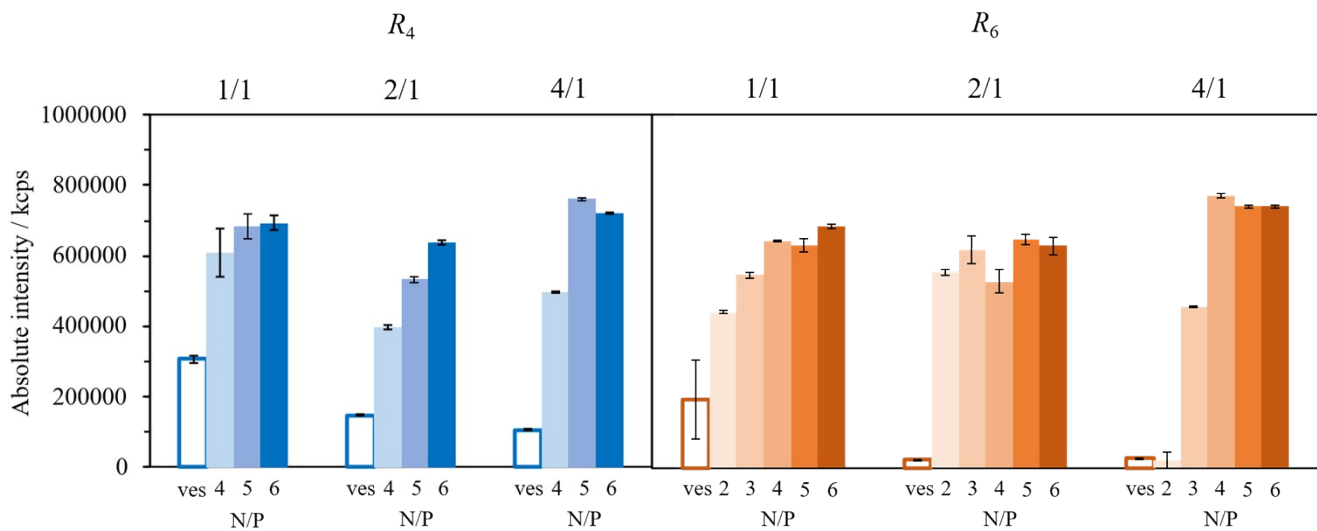

**Figure S14.** Absolute intensity counts obtained from DLS readings of the CnNCh/MO and CnNCh/MO/DNA systems at different N/P ratios upon preparation (experiments were performed at a fixed DNA concentration  $[NA_b] = 2.5 \times 10^{-4}$  M and  $T = 25.0$  °C).

## S6. Lipoplex response to stimuli – additional data

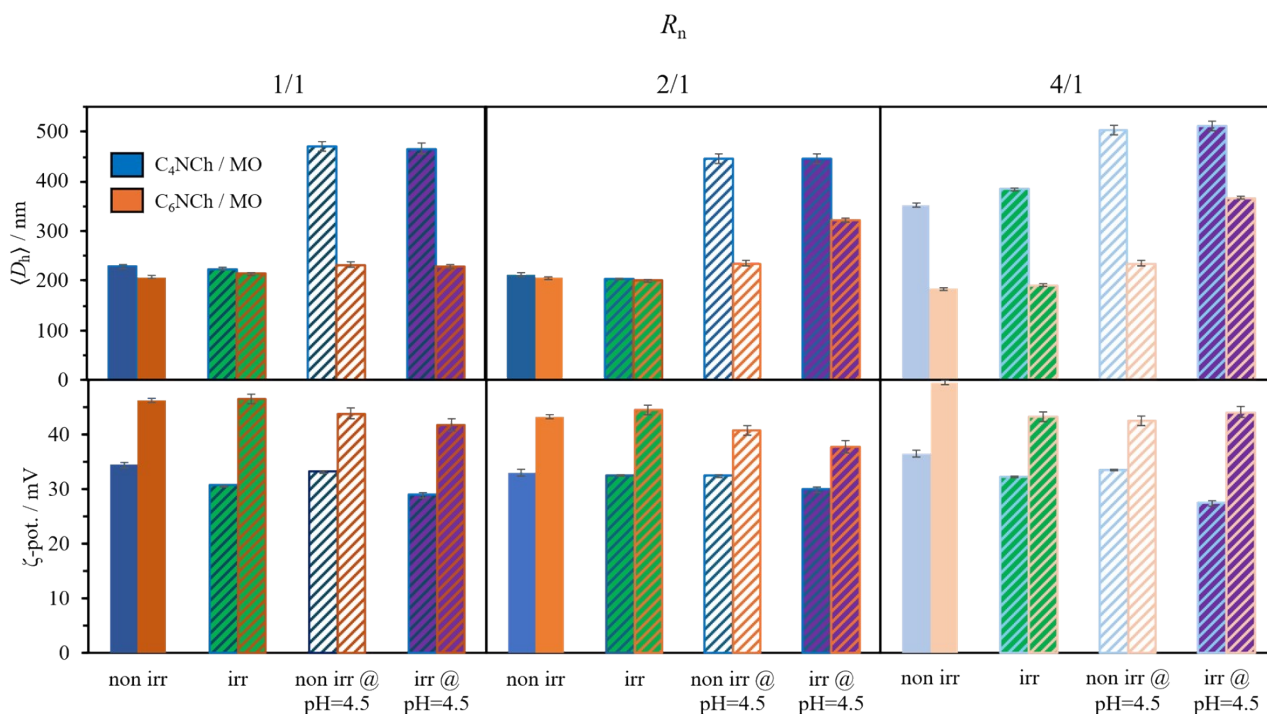

**Figure S15.** Mean  $D_h$  (top panel) and  $\zeta$ -potentials (bottom panel) of the N/P = 6 lipoplexes ( $[NA_b] = 2.5 \times 10^{-4}$  M) with(out) irradiation, at natural (ca. 6) or acidified (pH = 4.5) media (acetate buffer  $c = 50$  mM).

**Table S2.** DNA released (%) from the N/P = 6 lipoplexes ( $[NA_b] = 2.5 \times 10^{-4}$  M) upon irradiation ( $\lambda = 365$  nm) up to the photostationary state at the natural pH of the lipoplex formulation (ca. 6).

| $R_n$ | % of DNA released     |                       |
|-------|-----------------------|-----------------------|
|       | C <sub>4</sub> NCh/MO | C <sub>6</sub> NCh/MO |
| 1/1   | -2.5                  | 4.0                   |
| 2/1   | -3.9                  | 3.8                   |
| 4/1   | -0.2                  | 1.2                   |

## S7. Gene silencing studies – additional data

### i) Determination of *cac* of C<sub>n</sub>NCh/MO mixtures by surface tension

To ensure that the lipoplexes were still in aggregated form after the extensive dilution occurring in the transfection assays (incubation with cells), we determined the *cac* of the neat C<sub>n</sub>NCh/MO systems by surface tension measurements. The 1:1 and 4:1 ratios (the extremes of the C<sub>n</sub>NCh/MO range used) were measured, as the 2:1 will fall between (a decrease in MO content will systematically increase *cac*). Surface tension ( $\gamma$ ) of the C<sub>n</sub>NCh/MO mixtures was determined using a DCAT11 tensiometer, from Dataphysics, by the Wilhelmy method in the static mode (PT11 2,000,323 platinum-iridium Wilhelmy plate). All the experiments were performed at the controlled temperature of  $25.0 \pm 0.2$  °C using a thermostatic circulating water bath Julabo F20. To determine the critical aggregation concentration (*cac*), incremental aliquots of a concentrated C<sub>n</sub>NCh/MO aqueous mixture were added to a vessel containing ultrapure water. The surface tension was measured upon each aliquot addition and the value was recorded when  $\gamma$  did not vary for at least 60 s to ensure that equilibrium surface tension was reached.

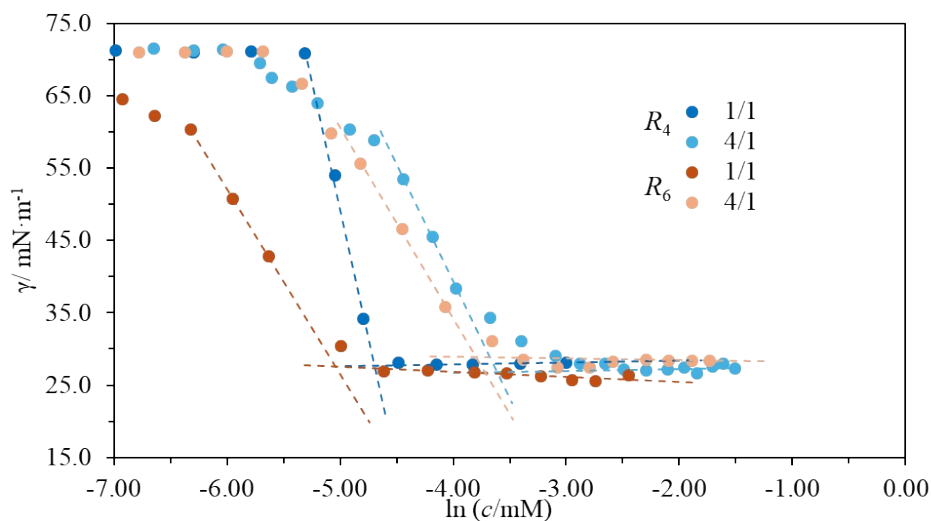

**Figure S16.** : Surface tension ( $\gamma$ ) plots of C<sub>n</sub>NCh/MO systems at  $R_n$  ratios 1/1 and 4/1 ( $T = 25.0$  °C).

**Table S3.** *cac* values of C<sub>n</sub>NCh/MO systems at  $R_n = 1/1$  and  $4/1$  at  $25.0$  °C obtained from surface tension plots.

| System                  | $R_n$ | <i>cac</i> / $\mu\text{M}$ |
|-------------------------|-------|----------------------------|
| C <sub>4</sub> NCh / MO | 1/1   | $9 \pm 1$                  |
|                         | 4/1   | $27 \pm 3$                 |
| C <sub>6</sub> NCh / MO | 1/1   | $6 \pm 1$                  |
|                         | 4/1   | $22 \pm 3$                 |



ii) Fluorescence microscopy

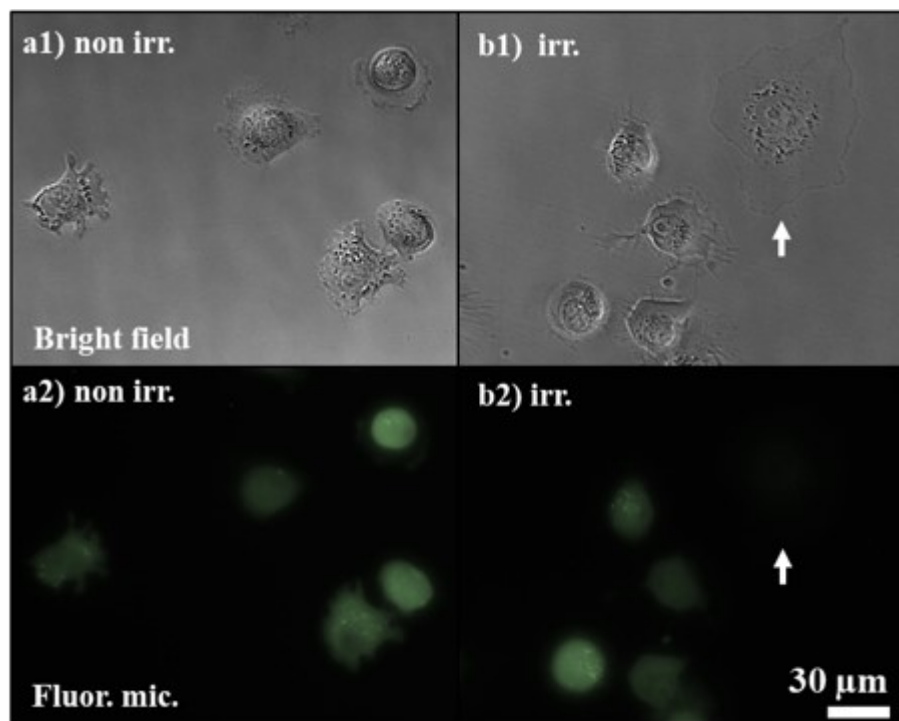

**Figure S17.** Representative examples of bright field and corresponding fluorescence microscopy micrographs of MCF7-copGFP cells 6h post incubation with  $R_4 = 1/1$ ,  $N/P = 6$  ( $[\text{NA}_b] = 2.5 \times 10^{-4} \text{ M}$ ) entrapping a copGFP siRNA without (a1 and a2) and with (b1 and b2) irradiation. White arrow is pointing towards a cell with no apparent copGFP expression. Fluorescence microscopy micrographs were acquired on a gray scale, the recoloring was performed only for enhanced visualization.

## References

- (1) Al-Smadi, M.; Hanold, N.; Meier, H. Multiple 1,2,3-thiadiazoles. *Journal of Heterocyclic Chemistry* **1997**, *34* (2), 605-611.
- (2) Casey, J. R.; Grinstein, S.; Orlowski, J. Sensors and regulators of intracellular pH. *Nature Reviews Molecular Cell Biology* **2010**, *11* (1), 50-61.
- (3) van Meer, G.; Voelker, D. R.; Feigenson, G. W. Membrane lipids: where they are and how they behave. *Nature Reviews Molecular Cell Biology* **2008**, *9* (2), 112-124.
- (4) Urade, R.; Hayashi, Y.; Kito, M. Endosomes differ from plasma membranes in the phospholipid molecular species composition. *Biochimica et Biophysica Acta (BBA) - Biomembranes* **1988**, *946* (1), 151-163.
- (5) Carreira, A. C.; de Almeida, R. F. M.; Silva, L. C. Development of lysosome-mimicking vesicles to study the effect of abnormal accumulation of sphingosine on membrane properties. *Scientific Reports* **2017**, *7* (1), 3949.
- (6) Walde, P.; Cosentino, K.; Engel, H.; Stano, P. Giant Vesicles: Preparations and Applications. *ChemBioChem* **2010**, *11* (7), 848-865.
- (7) Rideau, E.; Wurm, F. R.; Landfester, K. Self-Assembly of Giant Unilamellar Vesicles by Film Hydration Methodologies. *Advanced Biosystems* **2019**, *3* (6), 1800324.
- (8) François-Martin, C.; Pincet, F. Actual fusion efficiency in the lipid mixing assay - Comparison between nanodiscs and liposomes. *Scientific Reports* **2017**, *7* (1), 43860.
- (9) Basílio, N.; Pischel, U. Drug Delivery by Controlling a Supramolecular Host–Guest Assembly with a Reversible Photoswitch. *Chemistry – A European Journal* **2016**, *22* (43), 15208-15211.
- (10) Choroba, K.; Zowiślok, B.; Kula, S.; Machura, B.; Maroń, A. M.; Erfurt, K.; Marques, C.; Cordeiro, S.; Baptista, P. V.; Fernandes, A. R. Optimization of Antiproliferative Properties of Triimine Copper(II) Complexes. *Journal of Medicinal Chemistry* **2024**, *67* (21), 19475-19502.
